# Supplementary material
Source: publisher site journal article supplement (https://www.dovepress.com/article/supplementary_file/608011/608011%20-%20Revised%20Supplementary%20Table%20S1..docx)
Supplement: Supplementary file 1 [file 608011%20-%20Revised%20Supplementary%20Table%20S1..docx]

**Supplementary Table S1. Pearson correlation between VLDL-C and SOD in the overall study population and fibroid subgroups.**

| **Group** | **n** | **Pearson r** | ***P*-value** |
| --- | --- | --- | --- |
| **Overall population** | 1435 | −0.122 | <0.001 |
| **Single** | 658 | −0.086 | 0.028 |
| **Multiple** | 777 | −0.150 | <0.001 |

VLDL-C, very-low-density lipoprotein cholesterol; SOD, superoxide dismutase; r, Pearson correlation coefficient. *P*-values were calculated using Pearson correlation analysis.
